# Supplementary material
Source: PubMed Central journal article supplement (PMC2856286)

Supplementary Table 1. The mass, yield and retention time for 27 lysine mutants of kalata B1.

Twenty-three mutants with single point mutation are sorted by loops. Three mutants with double lysine and one mutant with triple lysine mutation are listed at the bottom. The yield and retention time of the P24K mutant in loop 5 was not determined as the linear precursor of this mutant was insoluble in the standard folding buffer.

|                      | <b>Mutant</b>        | <b>Mass (Da)</b> | <b>% Yield</b> | <b>Retention time<sup>a</sup> (min)</b> |
|----------------------|----------------------|------------------|----------------|-----------------------------------------|
| <b>Wild-type</b>     | <b>Kalata B1</b>     | 2892.3           | N/A            | 43.7                                    |
| <b>Loop 1</b>        | <b>G6K</b>           | 2963.4           | 9.1            | 40.6                                    |
|                      | <b>E7K</b>           | 2891.4           | 8.6            | 41.9                                    |
|                      | <b>T8K</b>           | 2919.4           | 14.8           | 33.5                                    |
| <b>Loop 2</b>        | <b>V10K</b>          | 2921.3           | 22.3           | 35.9                                    |
|                      | <b>G11K</b>          | 2963.4           | 27.3           | 40.8                                    |
|                      | <b>G12K</b>          | 2963.4           | 14.9           | 40.9                                    |
|                      | <b>T13K</b>          | 2919.4           | 16.7           | 42.3                                    |
| <b>Loop 3</b>        | <b>N15K</b>          | 2906.4           | 35.7           | 42.1                                    |
|                      | <b>T16K</b>          | 2919.4           | 27.4           | 41.7                                    |
|                      | <b>P17K</b>          | 2923.4           | 15.2           | 42.7                                    |
|                      | <b>G18K</b>          | 2963.4           | 22.2           | 42.9                                    |
| <b>Loop 4</b>        | <b>T20K</b>          | 2919.4           | 38.4           | 42.7                                    |
| <b>Loop 5</b>        | <b>S22K</b>          | 2933.4           | 27.2           | 40.5                                    |
|                      | <b>W23K</b>          | 2834.3           | 22.9           | 34.1                                    |
|                      | <b>P24K</b>          | 2923.4           | N/D            | N/D                                     |
|                      | <b>V25K</b>          | 2921.3           | 28.8           | 30.8                                    |
| <b>Loop 6</b>        | <b>T27K</b>          | 2919.4           | 31.2           | 37.8                                    |
|                      | <b>R28K</b>          | 2864.3           | 32.9           | 43.5                                    |
|                      | <b>N29K</b>          | 2906.4           | 29.2           | 42.3                                    |
|                      | <b>G1K</b>           | 2963.4           | 23.1           | 41.6                                    |
|                      | <b>L2K</b>           | 2907.3           | 35.4           | 37.9                                    |
|                      | <b>P3K</b>           | 2923.4           | 20.5           | 38.1                                    |
|                      | <b>V4K</b>           | 2921.3           | 10.9           | 39.2                                    |
| <b>Double-lysine</b> | <b>T20K/S22K</b>     | 2960.5           | 28.7           | 39.5                                    |
|                      | <b>T20K/N29K</b>     | 2933.4           | 21.2           | 41.7                                    |
|                      | <b>T20K/G1K</b>      | 2990.5           | 20.8           | 40.8                                    |
| <b>Triple-lysine</b> | <b>T20K/N29K/G1K</b> | 3004.6           | 15.9           | 39.7                                    |

<sup>a</sup>The retention time of peptides was assessed using analytical HPLC with a 1%/min gradient of solvent B against solvent A starting from 5% solvent B.

Supplementary Table 2. Chemical shifts of  $\alpha$ -proton signal for the 26 lysine mutants of kalata B1.

| Residue | kalata B1 | G6K  | E7K  | T8K  | V10K | G11K | G12K | T13K | N15K | T16K | P17K | G18K | T20K | S22K | W23K | V25K | T27K | R28K | N29K | G1K  | L2K  | P3K  | V4K  | T20K/S22K | T20K/N29K | T20K/G1K | T20K/N29K/G1K |
|---------|-----------|------|------|------|------|------|------|------|------|------|------|------|------|------|------|------|------|------|------|------|------|------|------|-----------|-----------|----------|---------------|
| C5      | 4.45      | 4.33 | 4.48 | 4.40 | 4.37 | 4.39 | 4.38 | 4.40 | 4.40 | 4.33 | 4.41 | 4.38 | 4.40 | 4.40 | 4.39 | 4.41 | 4.40 | 4.43 | 4.39 | 4.41 | 4.42 | 4.46 | 4.49 | 4.39      | 4.38      | 4.41     | 4.38          |
| G6      | 3.77      | 3.70 | 3.81 | 3.72 | 3.69 | 3.72 | 3.72 | 3.73 | 3.70 | 3.71 | 3.73 | 3.70 | 3.67 | 3.75 | 3.72 | 3.74 | 3.75 | 3.73 | 3.72 | 3.73 | 3.73 | 3.76 | 3.73 | 3.72      | 3.72      | 3.73     | 3.72          |
| E7      | 4.75      | 4.61 | 4.68 | 4.60 | 4.69 | 4.72 | 4.71 | 4.73 | 4.72 | 4.74 | 4.71 | 4.70 | 4.71 | 4.73 | 4.73 | 4.71 | 4.74 | 4.73 | 4.71 | 4.72 | 4.72 | 4.69 | 4.70 | 4.70      | 4.70      | 4.72     | 4.68          |
| T8      | 4.55      | 4.52 | 4.54 | 4.47 | 4.48 | 4.51 | 4.51 | 4.50 | 4.51 | 4.51 | 4.51 | 4.49 | 4.51 | 4.53 | 4.64 | 4.51 | 4.54 | 4.51 | 4.50 | 4.51 | 4.51 | 4.51 | 4.49 | 4.52      | 4.50      | 4.51     | 4.50          |
| C9      | 5.03      | 4.86 | 4.70 | 4.67 | 4.76 | 4.86 | 4.72 | 4.69 | 4.84 | 4.86 | 4.94 | 4.89 | 4.90 | 4.97 | 4.92 | 4.76 | 4.86 | 4.89 | 4.92 | 4.93 | 4.88 | 4.92 | 4.89 | 4.87      | 4.86      | 4.88     | 4.88          |
| V10     | 3.81      | 3.83 | 3.96 | 3.97 | 4.18 | 3.81 | 4.12 | 3.96 | 3.89 | 3.86 | 3.81 | 3.79 | 3.82 | 3.81 | 3.87 | 3.96 | 3.88 | 3.81 | 3.81 | 3.82 | 3.84 | 3.86 | 3.80 | 3.85      | 3.83      | 3.85     | 3.83          |
| G11     | 4.07      | 3.98 | 3.97 | 3.94 | 3.95 | 4.35 | 3.87 | 3.94 | 3.97 | 3.99 | 4.02 | 3.99 | 4.00 | 4.03 | 3.91 | 3.96 | 3.99 | 4.00 | 4.01 | 4.02 | 4.00 | 4.01 | 3.98 | 3.98      | 3.99      | 3.99     | 3.98          |
| G12     | 4.26      | 4.17 | 4.13 | 4.11 | 4.13 | 4.11 | 4.65 | 4.06 | 4.14 | 4.16 | 4.21 | 4.18 | 4.18 | 4.20 | 4.03 | 4.12 | 4.16 | 4.18 | 4.19 | 4.20 | 4.19 | 4.20 | 4.18 | 4.16      | 4.16      | 4.18     | 4.17          |
| T13     | 4.71      | 4.67 | 4.72 | 4.69 | 4.65 | 4.63 | 4.52 | 4.67 | 4.68 | 4.68 | 4.67 | 4.65 | 4.65 | 4.69 | 4.58 | 4.67 | 4.69 | 4.66 | 4.67 | 4.67 | 4.67 | 4.69 | 4.65 | 4.66      | 4.64      | 4.66     | 4.64          |
| C14     | 4.70      | 4.67 | 4.69 | 4.74 | 4.66 | 4.63 | 4.56 | 4.67 | 4.68 | 4.64 | 4.66 | 4.64 | 4.65 | 4.64 | 4.64 | 4.69 | 4.68 | 4.66 | 4.66 | 4.67 | 4.68 | 4.68 | 4.65 | 4.67      | 4.67      | 4.68     | 4.67          |
| N15     | 4.72      | 4.64 | 4.66 | 4.64 | 4.64 | 4.66 | 4.67 | 4.62 | 4.18 | 4.76 | 4.65 | 4.64 | 4.66 | 4.66 | 4.58 | 4.63 | 4.64 | 4.66 | 4.66 | 4.67 | 4.65 | 4.68 | 4.64 | 4.61      | 4.63      | 4.64     | 4.63          |
| T16     | 4.30      | 4.40 | 4.63 | 4.38 | 4.31 | 4.41 | 4.40 | 4.43 | 4.21 | 4.51 | 4.18 | 4.37 | 4.34 | 4.28 | 4.35 | 4.43 | 4.47 | 4.39 | 4.32 | 4.33 | 4.42 | 4.33 | 4.33 | 4.37      | 4.37      | 4.39     | 4.34          |
| P17     | 4.26      | 4.20 | 4.22 | 4.20 | 4.18 | 4.20 | 4.19 | 4.21 | 4.19 | 4.22 | 3.97 | 4.18 | 4.21 | 4.20 | 4.20 | 4.21 | 4.22 | 4.20 | 4.21 | 4.21 | 4.22 | 4.22 | 4.20 | 4.20      | 4.20      | 4.20     | 4.19          |
| G18     | 3.94      | 3.88 | 3.90 | 3.87 | 3.86 | 3.88 | 3.87 | 3.90 | 3.89 | 3.87 | 3.91 | 3.78 | 3.88 | 3.90 | 3.87 | 3.88 | 3.90 | 3.87 | 3.90 | 3.90 | 3.89 | 3.91 | 3.88 | 3.90      | 3.88      | 3.90     | 3.88          |
| C19     | 5.37      | 5.23 | 5.33 | 5.27 | 5.27 | 5.29 | 5.29 | 5.26 | 5.26 | 5.22 | 5.31 | 5.27 | 5.23 | 5.35 | 5.24 | 5.22 | 5.09 | 5.26 | 5.31 | 5.29 | 5.28 | 5.25 | 5.31 | 5.23      | 5.23      | 5.19     | 5.18          |
| T20     | 4.53      | 4.47 | 4.51 | 4.47 | 4.44 | 4.48 | 4.24 | 4.22 | 4.44 | 4.49 | 4.48 | 4.46 | 4.52 | 4.50 | 4.42 | 4.47 | 4.51 | 4.47 | 4.48 | 4.49 | 4.48 | 4.51 | 4.45 | 4.52      | 4.51      | 4.52     | 4.51          |
| C21     | 4.59      | 4.50 | 4.58 | 4.41 | 4.45 | 4.52 | 4.51 | 4.46 | 4.50 | 4.50 | 4.54 | 4.52 | 4.52 | 4.53 | 4.55 | 4.57 | 4.45 | 4.54 | 4.52 | 4.52 | 4.53 | 4.57 | 4.52 | 4.50      | 4.52      | 4.51     | 4.50          |
| S22     | 4.79      | 4.69 | 4.71 | 4.69 | 4.68 | 4.71 | 4.73 | 4.69 | 4.69 | 4.72 | 4.74 | 4.71 | 4.71 | 4.58 | 4.64 | 4.69 | 4.72 | 4.71 | 4.72 | 4.74 | 4.72 | 4.73 | 4.68 | 4.54      | 4.69      | 4.71     | 4.69          |
| W23     | 4.08      | 4.04 | 4.06 | 4.06 | 4.05 | 4.00 | 4.12 | 4.05 | 4.04 | 4.02 | 4.05 | 4.02 | 4.04 | 4.00 | 3.96 | 4.08 | 3.97 | 4.04 | 4.04 | 4.04 | 4.04 | 4.08 | 4.07 | 4.08      | 4.03      | 4.04     | 4.03          |
| P24     | 3.46      | 3.40 | 3.34 | 3.31 | 3.39 | 3.35 | 3.24 | 3.27 | 3.39 | 3.37 | 3.42 | 3.38 | 3.41 | 3.44 | 4.52 | 3.39 | 3.45 | 3.40 | 3.41 | 3.41 | 3.40 | 3.42 | 3.39 | 3.43      | 3.39      | 3.40     | 3.39          |
| V25     | 4.21      | 4.16 | 4.19 | 4.29 | 4.15 | 4.17 | 4.19 | 4.19 | 4.18 | 4.15 | 4.17 | 4.15 | 4.17 | 4.21 | 4.34 | 4.42 | 4.14 | 4.17 | 4.17 | 4.18 | 4.18 | 4.26 | 4.14 | 4.19      | 4.17      | 4.17     | 4.18          |
| C26     | 5.07      | 5.05 | 5.07 | 5.00 | 5.01 | 5.05 | 5.10 | 5.05 | 5.03 | 5.07 | 5.03 | 5.01 | 5.07 | 4.98 | 5.06 | 5.15 | 4.88 | 5.04 | 5.02 | 5.02 | 5.05 | 5.11 | 5.02 | 4.98      | 5.06      | 5.05     | 5.02          |
| T27     | 5.08      | 4.98 | 4.98 | 4.99 | 5.02 | 5.01 | 4.99 | 5.01 | 5.00 | 4.99 | 5.03 | 5.01 | 5.01 | 5.09 | 5.01 | 4.99 | 4.98 | 5.01 | 5.01 | 5.03 | 4.99 | 5.04 | 4.93 | 5.05      | 5.01      | 5.01     | 4.99          |
| R28     | 4.75      | 4.69 | 4.76 | 4.69 | 4.74 | 4.69 | 4.69 | 4.69 | 4.69 | 4.73 | 4.70 | 4.71 | 4.70 | 4.70 | 4.69 | 4.71 | 4.75 | 4.67 | 4.72 | 4.68 | 4.71 | 4.79 | 4.70 | 4.71      | 4.69      | 4.69     | 4.67          |
| N29     | 4.41      | 4.44 | 4.46 | 4.44 | 4.52 | 4.44 | 4.42 | 4.43 | 4.34 | 4.35 | 4.36 | 4.34 | 4.33 | 4.38 | 4.32 | 4.36 | 4.34 | 4.34 | 3.87 | 4.34 | 4.37 | 4.38 | 4.36 | 4.33      | 3.84      | 4.31     | 3.84          |
| G1      | 3.92      | 3.85 | 3.87 | 3.85 | 3.77 | 3.85 | 3.85 | 3.85 | 3.84 | 3.86 | 3.87 | 3.85 | 3.87 | 3.88 | 3.87 | 3.87 | 3.85 | 3.86 | 3.86 | 3.57 | 3.89 | 3.88 | 3.86 | 3.86      | 3.84      | 3.58     | 3.59          |
| L2      | 5.08      | 4.99 | 4.98 | 4.99 | 4.91 | 5.01 | 4.99 | 5.00 | 5.00 | 5.01 | 5.03 | 5.01 | 5.02 | 5.02 | 5.01 | 4.99 | 5.09 | 5.01 | 5.01 | 5.01 | 4.99 | 4.61 | 4.94 | 5.00      | 4.99      | 4.98     | 4.95          |
| P3      | 5.09      | 4.98 | 4.97 | 4.99 | 4.99 | 5.01 | 5.00 | 5.00 | 5.01 | 5.01 | 5.04 | 5.01 | 5.03 | 5.08 | 5.04 | 5.11 | 5.11 | 5.04 | 5.01 | 5.01 | 5.03 | 4.52 | 4.94 | 5.04      | 4.99      | 4.99     | 4.95          |
| V4      | 4.68      | 4.55 | 4.59 | 4.59 | 4.58 | 4.61 | 4.60 | 4.61 | 4.61 | 4.61 | 4.63 | 4.58 | 4.62 | 4.64 | 4.63 | 4.62 | 4.64 | 4.63 | 4.61 | 4.62 | 4.63 | 4.55 | 4.65 | 4.63      | 4.61      | 4.62     | 4.58          |

Supplementary Figure 1. Effects of the 22 correctly folded lysine mutants of kalata B1 on the development of eggs to third instar (L3) larvae of *T. columbriformis*. Each dose was conducted in triplicate and the error bars represent the standard deviation per treatment.

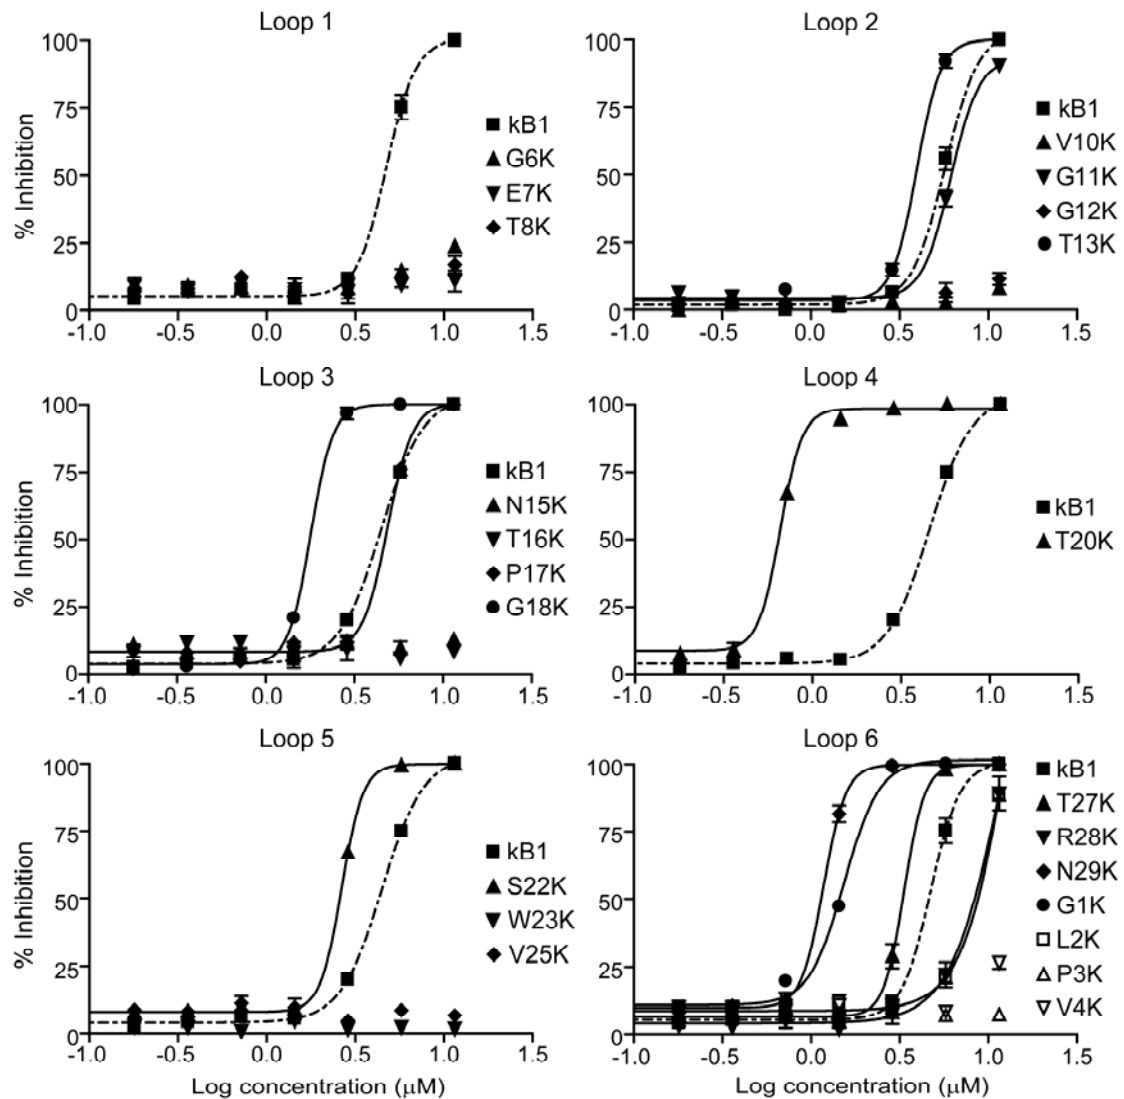

Supplement: supp_M109.089854_jbc.M109.089854-1.pdf [file supp_M109.089854_jbc.M109.089854-1.pdf]
